# Supplementary material
Source: MDPI journal article supplement (https://www.mdpi.com/2073-4395/11/12/2592)
Supplement: s1 [file s1]

Supplementary Table S1. List of vegetation indices used in correlation analyses with nitrate equations for their calculation from reflectance's in given wavelength (RX is the reflectance) and the references for each index.

| <i><b>Vegetation index</b></i> | <i><b>Equation</b></i>                                                                |
|--------------------------------|---------------------------------------------------------------------------------------|
| ANMB <sub>650-725</sub>        | Area under curve (650 - 725nm) normalised to maximal band depth                       |
| NDVI                           | $NDVI = (R_{780} - R_{670}) / (R_{780} + R_{670})$                                    |
| NDGI                           | $NDGI = (R_{780} - R_{550}) / (R_{780} + R_{670})$                                    |
| NRERI                          | $NRERI = (R_{780} - R_{720}) / (R_{780} - R_{680})$                                   |
| RDVI                           | $RDVI = (R_{800} - R_{670}) / \sqrt{(R_{800} + R_{670})}$                             |
| MSR                            | $MSR = ((R_{780} / R_{670}) - 1) / \sqrt{((R_{780} / R_{670}) + 1)}$                  |
| MTVI1                          | $MTVI1 = 1.2 * [1.2 * (R_{800} - R_{550}) - 2.5 * (R_{670} - R_{550})]$               |
| TCARI                          | $TCARI = 3 * [(R_{700} - R_{670}) - 0.2 * (R_{700} - R_{550}) * (R_{700} / R_{670})]$ |
| OSAVI                          | $OSAVI = (1 + 0.16) * (R_{800} - R_{670}) / (R_{800} + R_{670} + 0.16)$               |
| TCARI/OSAVI                    | $TCARI/OSAVI$                                                                         |
| G (Greenness Index)            | $G = (R_{554}) / (R_{677})$                                                           |
| TVI                            | $TVI = 0.5 * [120 * (R_{750} - R_{550}) - 200 * (R_{670} - R_{550})]$                 |
| ZM                             | $ZM = (R_{750}) / (R_{710})$                                                          |
| SRPI                           | $SRPI = (R_{430}) / (R_{680})$                                                        |
| NPQI                           | $NPQI = (R_{415} - R_{435}) / (R_{415} + R_{435})$                                    |
| PRI                            | $PRI = (R_{531} - R_{570}) / (R_{531} + R_{570})$                                     |
| NPCI                           | $NPCI = (R_{680} - R_{430}) / (R_{680} + R_{430})$                                    |
| SIP1                           | $SIP1 = (R_{800} - R_{450}) / (R_{800} + R_{650})$                                    |
| VOG3                           | $VOG3 = (R_{734} - R_{747}) / (R_{715} + R_{720})$                                    |
| VOG2                           | $VOG2 = (R_{734} - R_{747}) / (R_{715} + R_{726})$                                    |
| GM1                            | $GM1 = (R_{750}) / (R_{550})$                                                         |
| GM2                            | $GM2 = (R_{750}) / (R_{550})$                                                         |
| WI                             | $WI = (R_{900}) / (R_{970})$                                                          |
| WI/NDVI                        | $WI/NDVI$                                                                             |



rogen status parameters,  
ice in wavelength X nm)

### ***Reference***

---

- Malenovský *et al.* (2006)  
Rouse *et al.* (1974)  
Klem *unpublished*  
Klem *et al.* (2014)  
Rougean & Breon (1995)  
Chen (1996)  
Haboudane *et al.* (2004)  
Haboudane *et al.* (2002)  
Rondeaux *et al.* (1996)  
Haboudane *et al.* (2002)  
Smith *et al.* (1995)  
Broge & Leblanc (2000)  
Zarco-Tejada *et al.* (2001)  
Peñuelas *et al.* (1995)  
Barnes *et al.* (1992)  
Gamon *et al.* (1992)  
Peñuelas *et al.* (1994)  
Peñuelas *et al.* (1995)  
Zarco-Tejada *et al.* (2001)  
Zarco-Tejada *et al.* (2001)  
Gitelson & Merzlyak (1997)  
Gitelson & Merzlyak (1997)  
Peñuelas *et al.* (1997)  
Piñol *et al.* (1998)
