# Supplementary material
Source: MDPI journal article supplement (https://www.mdpi.com/2073-4395/11/12/2592)
Supplement: s1 [file s1]

Supplementary Table S2. Sensitivity analysis for individual input reflectance wavelength in winning neural networks for estimation of nitrogen. status parameters

DC 29-31

| N content in dry matter (%) |                   | NNI     |                   | N uptake (kg ha <sup>-1</sup> ) |                   |
|-----------------------------|-------------------|---------|-------------------|---------------------------------|-------------------|
| Ranking                     | Sensitivity score | Ranking | Sensitivity score | Ranking                         | Sensitivity score |
| 5                           | 8.1               | 4       | 13.6              | 1                               | <b>16.6</b>       |
| 6                           | 5.8               | 7       | 5.1               | 3                               | <b>6.7</b>        |
| 12                          | 2.5               | 1       | <b>17.7</b>       | 10                              | 4.7               |
| 4                           | 9.6               | 3       | <b>15.1</b>       | 8                               | 5.0               |
| 3                           | <b>12.7</b>       | 2       | <b>16.2</b>       | 7                               | 5.6               |
| 1                           | <b>21.3</b>       | 5       | 9.4               | 9                               | 4.7               |
| 7                           | 5.0               | 15      | 1.0               | 12                              | 4.5               |
| 2                           | <b>12.8</b>       | 10      | 2.1               | 6                               | 5.8               |
| 10                          | 3.2               | 11      | 1.9               | 2                               | <b>7.3</b>        |
| 11                          | 2.6               | 16      | 1.0               | 15                              | 4.3               |
| 17                          | 1.0               | 13      | 1.5               | 17                              | 4.2               |
| 9                           | 3.9               | 14      | 1.1               | 5                               | 6.4               |
| 15                          | 1.4               | 12      | 1.7               | 14                              | 4.4               |
| 8                           | 5.0               | 6       | 6.8               | 4                               | 6.5               |
| 16                          | 1.3               | 17      | 0.9               | 13                              | 4.5               |
| 14                          | 1.7               | 9       | 2.2               | 16                              | 4.2               |
| 13                          | 2.2               | 8       | 2.8               | 11                              | 4.6               |

DC 39

| N content in dry matter (%) |                   | NNI     |                   | N uptake (kg ha <sup>-1</sup> ) |                   |
|-----------------------------|-------------------|---------|-------------------|---------------------------------|-------------------|
| Ranking                     | Sensitivity score | Ranking | Sensitivity score | Ranking                         | Sensitivity score |
| 2                           | <b>10.1</b>       | 8       | 0.0               | 1                               | <b>50.5</b>       |
| 1                           | <b>10.3</b>       | 7       | 0.0               | 4                               | 3.9               |
| 4                           | 7.5               | 6       | 0.0               | 5                               | 3.7               |
| 16                          | 2.0               | 11      | 0.0               | 8                               | 2.4               |
| 14                          | 3.9               | 15      | 0.0               | 7                               | 3.2               |
| 17                          | 1.9               | 5       | 0.6               | 2                               | <b>13.3</b>       |
| 12                          | 4.1               | 1       | <b>50.1</b>       | 6                               | 3.2               |
| 8                           | 6.4               | 3       | <b>20.6</b>       | 10                              | 2.0               |
| 9                           | 6.2               | 16      | 0.0               | 9                               | 2.1               |
| 6                           | 7.0               | 12      | 0.0               | 14                              | 1.6               |
| 5                           | 7.2               | 17      | 0.0               | 12                              | 1.6               |
| 11                          | 5.1               | 10      | 0.0               | 17                              | 1.1               |
| 3                           | <b>8.0</b>        | 4       | 1.1               | 3                               | <b>5.2</b>        |
| 7                           | 7.0               | 9       | 0.0               | 13                              | 1.6               |
| 10                          | 6.0               | 13      | 0.0               | 15                              | 1.3               |
| 15                          | 3.4               | 14      | 0.0               | 16                              | 1.3               |
| 13                          | 4.0               | 2       | <b>27.7</b>       | 11                              | 1.9               |
